# Supplementary material
Source: PubMed Central journal article supplement (PMC4213943)
Supplement: NIHMS633823-supplement-Supporting_Information.pdf [file NIHMS633823-supplement-Supporting_Information.pdf]

# Supplementary Material

## Structural and biochemical studies of actin in complex with synthetic macrolides-tail analogs

Jose H. Pereira<sup>a</sup>, Chutima Petchprayoon<sup>b</sup>, Alexander C. Hoepker<sup>b</sup>, Nigel Moriarty<sup>a</sup>, Sarah J. Fink<sup>c</sup>, Giuseppe Cecere<sup>c</sup>, Ian Paterson<sup>c</sup>, Paul D. Adams<sup>a,b</sup> and Gerard Marriott<sup>a,b,\*</sup>

<sup>a</sup> Physical Biosciences Division, Lawrence Berkeley National Laboratory, Berkeley, CA 94720, USA

<sup>b</sup> Department of Bioengineering, University of California Berkeley, CA 94720, US

<sup>c</sup> University Chemical Laboratory, Lensfield Road, Cambridge CB2 1EW, UK.

\*Correspondence: [marriott1@berkeley.edu](mailto:marriott1@berkeley.edu)

## **INDEX**

**Fig S1: Emission spectra of Prodan-G-actin as a function of [Analog 1]**

**Fig S2: Emission spectra of Prodan-G-actin as a function of [Analog 2]**

**Fig S3: Emission spectra of Prodan-G-actin as a function of [KabC]**

**Fig S4: Emission spectra of Prodan-G-actin in the presence of DMF**

**Fig S5: Emission spectra of Prodan-G-actin as a function of [SF-01] and titration data**

**Fig S6: Emission spectra of Prodan-G-actin as a function of [SF-01] and and titration data**

## Supplementary Figure S1

Structure of Analog 1

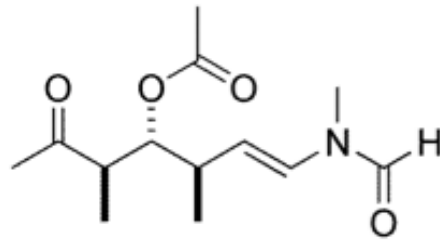

Stoichiometric binding study of Analog 1 (0-2  $\mu\text{M}$ ) to Prodan-G-actin (1  $\mu\text{M}$ )

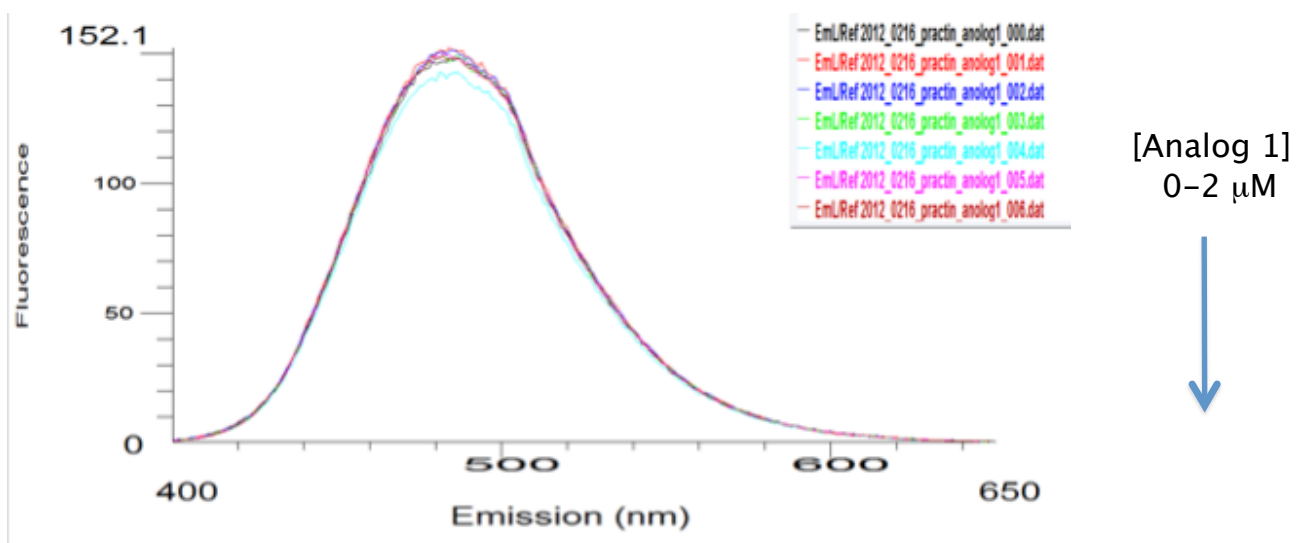

## Supplementary Figure S2

Structure of Analog 2

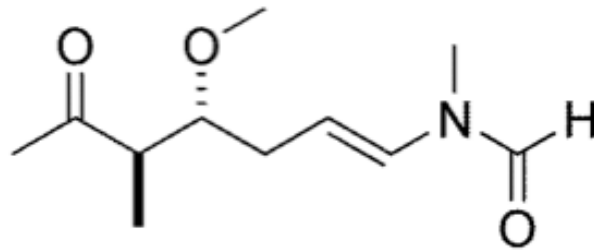

Stoichiometric binding study of Analog 2 (0-2  $\mu\text{M}$ ) to Prodan-G-actin (1  $\mu\text{M}$ )

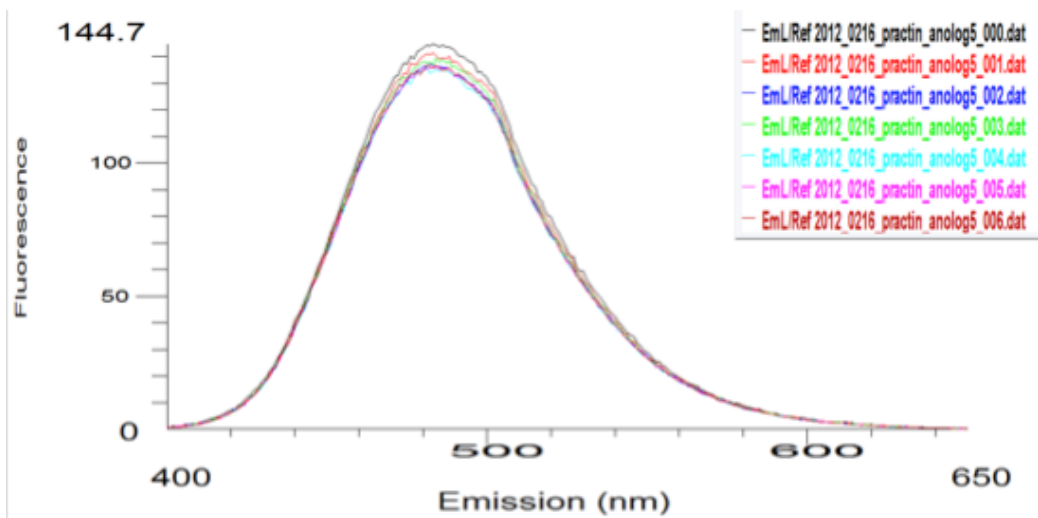

[Analog 2]  
0-2  $\mu\text{M}$

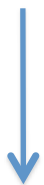

### Supplementary Figure S3

#### Stoichiometric binding study of KabC (0-2 $\mu\text{M}$ ) to Prodan-G-actin (1 $\mu\text{M}$ )

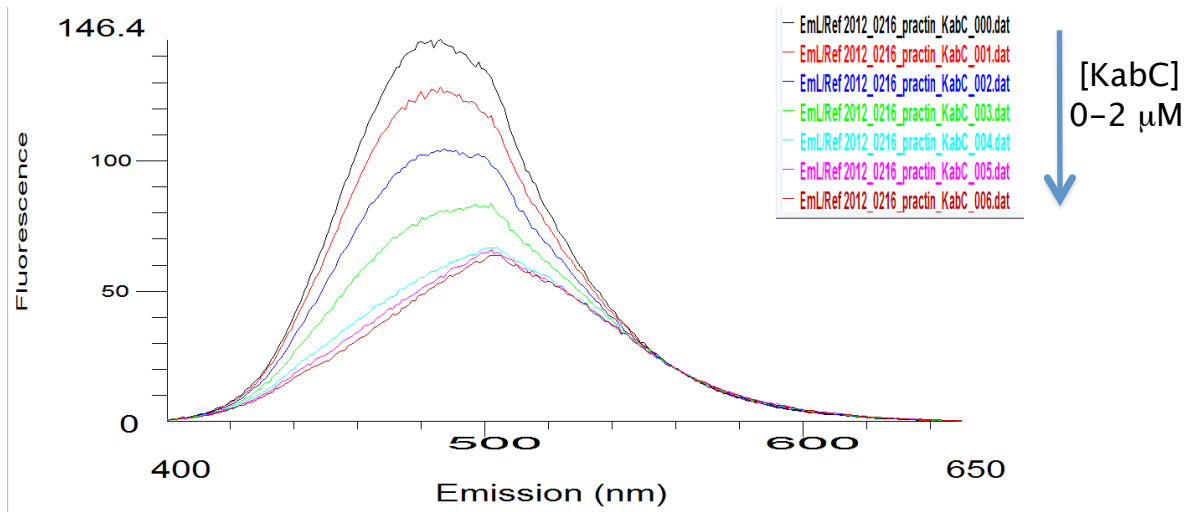

## Supplementary Figure S4

Effect of DMF (solvent) on the emission of 1  $\mu$ M Prodan-G-actin

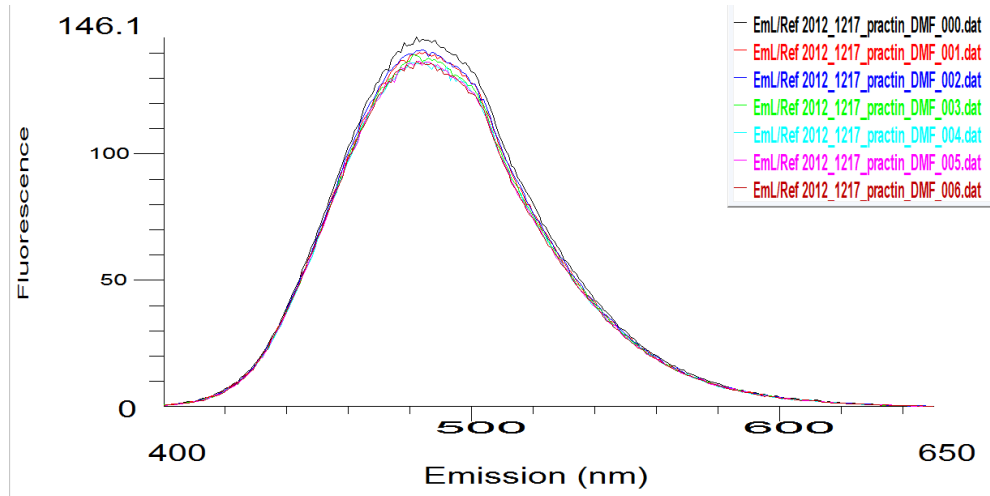

## Supplementary Figure S5

### Equilibrium binding of SF-01 to 200 nM Prodan-G-actin

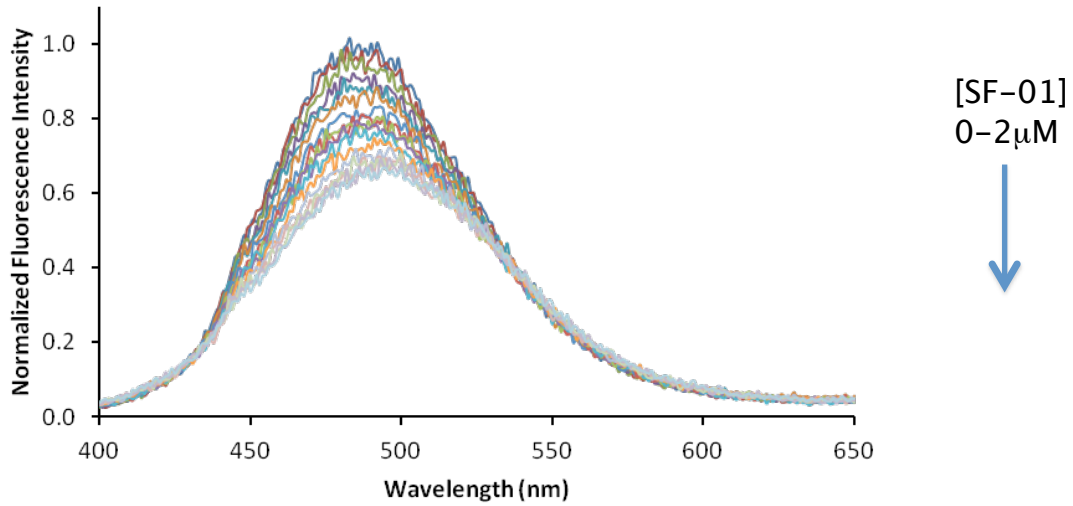

| [SF-01] | nM | SF-01 Integrated Intensity |
|---------|----|----------------------------|
| 0       |    | 89.76062146                |
| 20      |    | 88.36692392                |
| 50      |    | 87.05339746                |
| 100     |    | 84.67808965                |
| 150     |    | 83.867188                  |
| 200     |    | 82.08230519                |
| 250     |    | 79.22343035                |
| 300     |    | 77.45858019                |
| 350     |    | 77.03021842                |
| 400     |    | 76.67993842                |
| 500     |    | 75.269298                  |
| 750     |    | 74.08762135                |
| 1000    |    | 72.89847692                |
| 1250    |    | 71.09848738                |
| 1500    |    | 71.59781923                |
| 1750    |    | 71.12894454                |
| 2000    |    | 70.87114654                |

## Supplementary Figure S6

### Equilibrium binding of GC-04 to 200 nM Prodan-G-actin

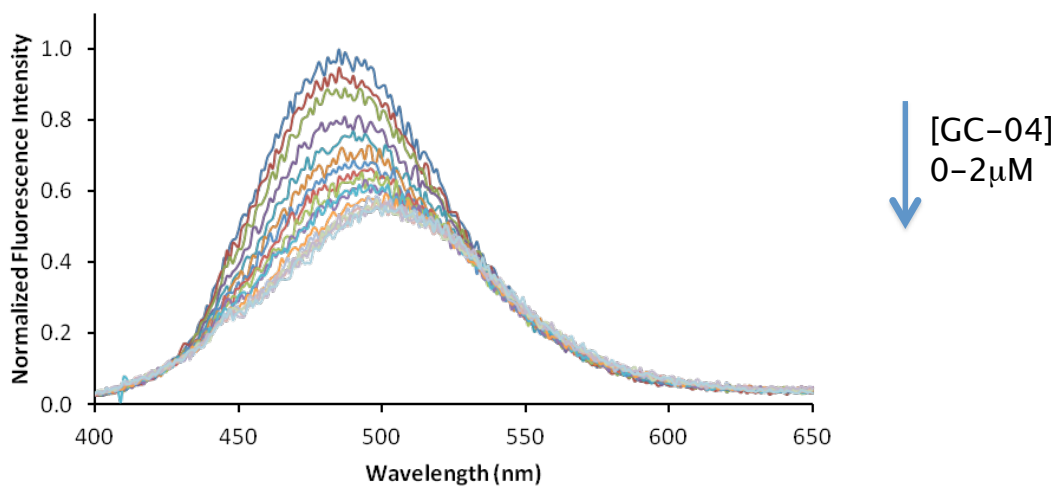

#### Titration results

| [GC-04] nM | GC-04 Integrated Intensity |
|------------|----------------------------|
| 0          | 86.7963132                 |
| 20         | 82.90088825                |
| 50         | 80.42456299                |
| 100        | 75.21810251                |
| 150        | 71.67034331                |
| 200        | 68.76176046                |
| 250        | 66.83001179                |
| 300        | 65.40357132                |
| 350        | 64.17317011                |
| 400        | 62.26618536                |
| 500        | 62.07579096                |
| 750        | 60.40362045                |
| 1000       | 59.62705922                |
| 1250       | 59.31448987                |
| 1500       | 59.42065636                |
| 1750       | 59.77825469                |
| 2000       | 59.37938099                |
